# Supplementary material for: GC‑MSC‑derived circ_0024107 promotes gastric cancer cell lymphatic metastasis via fatty acid oxidation metabolic reprogramming mediated by the miR‑5572/6855‑5p/CPT1A axis
Source: PubMed Central journal article supplement — Oncol Rep. 2023 May 29;50(1):138. doi: 10.3892/or.2023.8575 (PMC10251368; doi:10.3892/or.2023.8575), 2023-05-29
Supplement: Supplementary_Data2.pdf [file Supplementary_Data2.pdf]

**Table SI.** Primer sequences for circRNAs and mRNAs used in the present study.

| Name               | Primer sequences (5'-3')                               |
|--------------------|--------------------------------------------------------|
| Convergent primers | F: CTCTGACGTTGATCCCAGAGAG<br>R: AGTGACTGCACATGTGTTCTTG |
| Divergent primers  | F: TGAGTCTTTGCCGGAGGAAAAGC<br>R: CGATGGGCTGGACAGGATTTT |
| MMP1               | F: ATGTGGACCATGCCATTGAG<br>R: GAGCTGCAACACGATGTAAG     |
| $\beta$ -actin     | F: CACGAAACTACCTTCAACTCC<br>R: CATACTCCTGCTTGCTGATC    |
| U3                 | F: GAGCACCGAAAACCACG<br>R: CTCTCACTCCCAATACG           |
| GAPDH              | F: ACCATACAGACATCCGTAACAGG<br>R: CTCACACTGAAACGCAACC   |
| CPT1A              | F: GCTGAGCCATGAAGCTCTTAG<br>R: CGTACATCGTTGTCATCACGC   |

F, forward; R, reverse; CPT1A, carnitine palmitoyltransferase 1A.

**Table SII.** Sequences of the oligonucleotides used in the present study.

| Oligonucleotides                 | Sequences (5'-3')                                                       |
|----------------------------------|-------------------------------------------------------------------------|
| Negative control                 | Sense: UUCUUCGAACGUGUCACGUTT<br>Antisense: ACGUGACACGUUCGGAGAATT        |
| si-circ_0024107-1                | Sense: GUUUUAUACACUUUCGACGTT<br>Antisense: UUUGGGAACGUCGAAAGCGTT        |
| si-circ_0024107-2                | Sense: CACUUUCGACGUUCCCAAATT<br>Antisense: UUUGGGAACGUCGAAAGCGTT        |
| Mimic negative control (MNC)     | Sense: UUCUUCGAACGUGUCACGUTT<br>Antisense: ACGUGACACGUUCGGAGAATT        |
| miR-5572 mimic                   | Sense: GUUGGGGUGCAGGGGUCUGCU<br>Antisense: CAGACCCUGCACCCCAACUU         |
| miR-6855-5p mimic                | Sense: UUGGGGUUUGGGGUGCAGACAUUGC<br>Antisense: AAUGUCUGCACCCCAAACCCAAUU |
| Inhibitor negative control (INC) | CAGUACUUUUGUGUAGUACAA                                                   |
| miR-5572 inhibitor               | AGCAGACCCUGCACCCCAAC                                                    |
| miR-6855-5p inhibitor            | GCAAUGUCUGCACCCCAAACCCCAA                                               |
