# Supplementary material for: GC‑MSC‑derived circ_0024107 promotes gastric cancer cell lymphatic metastasis via fatty acid oxidation metabolic reprogramming mediated by the miR‑5572/6855‑5p/CPT1A axis
Source: PubMed Central journal article supplement — Oncol Rep. 2023 May 29;50(1):138. doi: 10.3892/or.2023.8575 (PMC10251368; doi:10.3892/or.2023.8575), 2023-05-29
Supplement: Supplementary_Data5.pdf [file Supplementary_Data5.pdf]

**Table SV.** Association of the circ\_0024107-miR-5572/6855-5p/CPT1A axis with the clinicopathological characteristics of patients with gastric cancer.

| Parameters            | No. of patients | circ_0024107 levels |      | P-value      | CPT1A level |      | P value      | miR-5572 level |      | P-value | miR-6855-5p levels |      | P value |
|-----------------------|-----------------|---------------------|------|--------------|-------------|------|--------------|----------------|------|---------|--------------------|------|---------|
|                       |                 | Low                 | High |              | Low         | High |              | Low            | High |         | Low                | High |         |
| Sex                   |                 |                     |      |              |             |      |              |                |      |         |                    |      |         |
| Male                  | 28              | 11                  | 17   | 0.082        | 15          | 13   | NS           | 12             | 16   | 0.301   | 12                 | 16   | 0.301   |
| Female                | 12              | 9                   | 3    |              | 6           | 6    |              | 8              | 4    |         | 8                  | 4    |         |
| Age, years            |                 |                     |      |              |             |      |              |                |      |         |                    |      |         |
| ≥60                   | 32              | 16                  | 16   | NS           | 17          | 15   | NS           | 17             | 15   | 0.695   | 17                 | 15   | 0.695   |
| <60                   | 8               | 4                   | 4    |              | 4           | 4    |              | 3              | 5    |         | 3                  | 5    |         |
| Tumor site            |                 |                     |      |              |             |      |              |                |      |         |                    |      |         |
| cardiac               | 8               | 3                   | 5    | 0.695        | 3           | 5    | 0.442        | 4              | 4    | NS      | 5                  | 3    | 0.695   |
| Non-cardiac           | 32              | 17                  | 15   |              | 18          | 14   |              | 16             | 16   |         | 15                 | 17   |         |
| Differentiation grade |                 |                     |      |              |             |      |              |                |      |         |                    |      |         |
| Poor                  | 29              | 15                  | 14   | NS           | 16          | 13   | 0.727        | 13             | 16   | 0.48    | 14                 | 15   | NS      |
| Middle-well           | 11              | 5                   | 6    |              | 5           | 6    |              | 7              | 4    |         | 6                  | 5    |         |
| Neural invasion       |                 |                     |      |              |             |      |              |                |      |         |                    |      |         |
| Yes                   | 24              | 10                  | 14   | 0.333        | 11          | 13   | 0.349        | 14             | 10   | 0.333   | 14                 | 10   | 0.333   |
| No                    | 16              | 10                  | 6    |              | 10          | 6    |              | 6              | 10   |         | 6                  | 10   |         |
| T stage               |                 |                     |      |              |             |      |              |                |      |         |                    |      |         |
| T1+ T2                | 4               | 2                   | 2    | NS           | 2           | 2    | NS           | 4              | 0    | 0.106   | 3                  | 1    | 0.605   |
| T3 + T4               | 36              | 18                  | 18   |              | 19          | 17   |              | 16             | 20   |         | 17                 | 19   |         |
| Lymph node status     |                 |                     |      |              |             |      |              |                |      |         |                    |      |         |
| Yes                   | 32              | 12                  | 20   | <b>0.003</b> | 14          | 18   | <b>0.046</b> | 17             | 15   | 0.695   | 16                 | 16   | NS      |

|                    |    |    |    |              |    |    |       |    |    |       |    |    |       |
|--------------------|----|----|----|--------------|----|----|-------|----|----|-------|----|----|-------|
| No                 | 8  | 8  | 0  |              | 7  | 1  |       | 3  | 5  |       | 4  | 4  |       |
| Distant metastasis |    |    |    |              |    |    |       |    |    |       |    |    |       |
| M1                 | 2  | 0  | 2  | 0.487        | 2  | 0  | 0.488 | 0  | 2  | 0.487 | 0  | 2  | 0.487 |
| M0                 | 38 | 20 | 18 |              | 19 | 19 |       | 20 | 18 |       | 20 | 18 |       |
| TNM stage          |    |    |    |              |    |    |       |    |    |       |    |    |       |
| I + II             | 13 | 10 | 3  | <b>0.041</b> | 7  | 6  | NS    | 8  | 5  | 0.501 | 7  | 6  | NS    |
| III + IV           | 27 | 10 | 17 |              | 14 | 13 |       | 12 | 15 |       | 14 | 13 |       |

Values in bold font indicate statistically significant differences (P<0.05). NS, not significant; circRNA, circular RNA; CPT1A, carnitine palmitoyltransferase 1A.
